# Supplementary material for: Contributions of the Left- and the Right-Hemisphere on the Language-Induced Grip Force Modulation of the Left Hand in Unimanual Task
Source: Preprints.org preprint supplement (doi:10.20944/preprints201907.0139.v1), 2019-07-10
Supplement: Supplementary file 1 [file Contributions Left Right - Spreadsheet S1 - Dataset.xlsx]

## Sheet: GFM
Contributions of the left- and the right-hemisphere on the language-induced grip force modulation of the left hand in unimanual task
Spreadsheet S1: Dataset
Sample dataset by linguistic processing phases, intervals, and micro-intervals, in millinewtons.
WRITE																				DRAW																				HOLD
	P01	P02	P03	P04	P05	P06	P07	P08	P09	P10	P11	P12	P13	P14	P15	P16	P17	P18			P01	P02	P03	P04	P05	P06	P07	P08	P09	P10	P11	P12	P13	P14	P15	P16	P17	P18			P01	P02	P03	P04	P05	P06	P07	P08	P09
-200-0	-1.50717e-13	6.05488e-14	-2.28877e-14	1.75119e-14	8.99281e-14	1.02918e-13	3.84877e-16	-6.85642e-14	-7.71861e-14	-1.43314e-13	3.33067e-15	-6.93519e-14	8.50015e-15	4.67437e-14	5.31519e-14	-1.15741e-14	2.839e-14	-1.85473e-14		-200-0	-4.59763e-15	-4.39648e-14	5.22082e-14	2.16938e-14	4.93622e-14	1.36621e-13	-2.58225e-14	-2.90046e-14	-3.27294e-14	2.06706e-13	4.91534e-14	-2.41585e-14	-7.62638e-14	-1.73274e-14	-6.41709e-14	-7.84095e-16	5.40203e-14	1.12688e-13		-200-0	-1.07265e-14	5.83479e-16	5.05707e-14	-1.80411e-16	1.13243e-14	1.13243e-14	8.65974e-15	4.54557e-14	-9.38773e-14
0	0.718723	0.182225	2.23135	2.69509	0.408857	-0.558157	0.936747	-4.0742	0.951892	3.46543	0.0538333	2.61003	1.05024	-0.0594118	2.77603	-0.862713	-0.562184	1.6114		0	-0.496294	1.00775	2.11246	-0.205	0.329492	0.0466827	-1.44785	-4.36569	-0.221523	-0.139508	0.350094	1.45044	-0.584092	-3.19986	3.71637	-0.292338	0.305429	4.85242		0	1.83172	-0.0905529	0.892563	-1.70524	0.484829	0.484829	6.01575	-1.0342	0.579975
100-300	3.67322	0.464763	3.32695	-2.495	2.07969	3.60308	-0.915933	2.68761	-0.462046	10.8944	1.46393	3.74057	2.52901	3.63447	5.11155	-1.01398	1.1566	9.04766		100-300	-1.37392	0.820462	0.969488	0.0501467	1.80934	-0.320636	0.759576	0.763837	0.23756	-0.354354	0.814563	-0.396827	3.2012	-4.15757	9.94732	-1.29154	-1.17609	8.8807		100-300	3.40035	0.517988	3.45589	-1.60517	1.96621	1.96621	10.4287	2.04113	0.5732
300-500	7.35012	1.60591	6.75863	-3.86205	3.49091	7.36721	4.65165	5.41821	-0.166181	11.8288	3.22593	3.73857	5.59418	6.83471	6.26155	-1.72095	1.83083	15.9957		300-500	-0.1484	2.55609	2.91614	-0.01932	5.80971	2.25008	4.68713	9.64874	1.23995	1.71008	3.2395	8.82956	13.4257	5.44571	12.9622	-1.52226	-1.39484	21.8945		300-500	3.12765	1.31551	5.05501	1.15663	5.46521	5.46521	17.805	5.0447	2.8515
500-800	5.87963	1.9809	3.76742	-2.5846	-0.313476	8.96728	5.9996	5.66987	2.34553	11.9389	2.76823	2.17259	0.477038	7.12616	-0.312667	-1.87943	-8.84886	14.8455		500-800	-1.09872	4.0087	4.51122	0.110476	5.22767	6.55325	13.7466	13.7824	2.67142	-4.20339	5.07468	8.48268	16.9536	7.32281	3.59442	-1.02872	-8.43248	13.0436		500-800	2.20668	1.93909	3.86924	3.93471	7.44403	7.44403	23.1299	4.26817	5.20539
INTERVALS																				INTERVALS																				INTERVALS
100	1.08494	0.1565	2.19723	-1.48445	0.910371	3.47516	-2.18608	-1.14286	0.504562	8.84223	0.522833	2.77763	0.379888	2.43306	4.98633	-1.07146	2.30307	4.05675		100	-1.93018	1.0788	1.85929	-0.0754533	0.554877	-1.81243	-1.16578	-3.87129	-0.00435	-0.130277	0.796156	-2.29841	0.390185	-3.85929	8.07056	-1.02271	1.8329	5.03821		100	3.62674	0.134412	2.06936	-2.37439	1.12371	1.12371	9.12823	0.781886	0.192896
150	2.9426	0.21815	2.70855	-4.38173	1.40003	4.66654	-2.15861	2.56646	-0.375192	10.341	0.913233	2.8311	2.92359	3.31682	5.47378	-1.17891	-0.280167	7.1038		150	-2.13884	0.847969	0.949088	0.18668	1.18835	-0.484026	0.524671	-0.883238	0.120503	-0.462031	0.305531	-2.12476	4.83978	-4.30443	8.15856	-1.36656	-0.474639	5.61082		150	3.33	0.385518	2.99116	-2.18734	1.65983	1.65983	10.2425	2.01943	-0.102732
200	3.7306	0.391	3.92375	-1.50419	2.18094	1.91615	-1.06603	4.09417	-0.939146	11.4884	1.6907	3.44303	3.41844	4.13329	5.07458	-1.00721	-1.66303	11.2045		200	-1.08566	0.575415	0.210938	0.170893	2.09334	1.98852	1.77789	1.98371	0.0526367	-1.48455	0.896531	-1.82732	4.9508	-5.33643	11.5753	-1.53051	-2.03608	9.01028		200	3.09363	0.587824	4.10876	-0.952987	2.27914	2.27914	10.301	2.312	0.511282
250	6.93472	1.0934	4.47828	-2.60963	3.8274	4.35445	1.74699	5.23269	-1.03841	12.906	2.72897	5.9105	3.39414	4.65471	4.91153	-0.798313	4.26653	13.8256		250	-0.341	0.779662	0.858638	-0.0815333	3.40078	-0.974603	1.90152	5.82616	0.78145	0.659446	1.26003	4.66319	2.62403	-3.13014	11.9849	-1.24636	-4.02654	15.8635		250	3.55105	0.9642	4.65426	-0.905987	2.80217	2.80217	12.0431	3.0512	1.69135
300	9.569	1.24205	4.96818	-3.68675	4.47454	7.86338	3.23637	3.71931	-0.860669	15.7956	2.8587	8.11437	4.64919	5.59635	7.63613	-1.32361	0.791283	17.6564		300	0.255847	1.67505	1.37854	0.0406	4.11365	-1.51473	3.38396	8.10656	1.26145	1.59372	2.53478	9.425	8.2268	3.24129	13.0534	-1.55231	0.14384	23.2083		300	5.06908	1.27973	4.88691	-0.608987	4.21857	4.21857	14.8265	3.93983	2.13388
350	9.78075	1.6739	7.17575	-2.9844	3.97631	9.14362	3.92331	4.69286	-0.255808	13.9097	3.1411	2.98943	7.37014	7.75635	7.86403	-1.58046	3.28219	18.4598		350	0.223753	2.13665	2.88554	0.15596	5.44903	1.21457	3.66914	9.57306	1.30818	2.78738	3.30503	9.70527	14.604	4.14243	13.8298	-1.54716	2.7898	23.9839		350	3.68797	1.07794	4.97761	0.381963	4.986	4.986	16.6184	5.7824	2.83424
400	6.55263	1.7407	8.42972	-2.53389	3.45917	7.96837	4.75104	6.7528	-0.0828385	6.84154	3.58177	0.4125	6.36989	7.81612	6.16473	-1.83601	2.52912	11.7999		400	0.211706	2.89412	3.96254	0.0348933	7.04466	2.84273	4.15041	10.0545	1.00053	2.912	2.99353	8.33833	15.0091	6.74757	12.782	-1.33306	-1.69374	18.6999		400	2.20132	1.30453	5.14591	1.82406	5.76406	5.76406	18.7175	4.9248	2.35232
450	3.49811	1.767	6.46086	-6.24317	2.05363	4.49348	6.69589	6.50789	0.534592	10.7684	3.32217	3.43797	3.98749	6.17	3.38133	-2.14371	0.720724	16.0665		450	-1.28491	3.51855	3.43794	-0.308733	6.63149	6.45777	7.545	10.8608	1.38962	-0.4528	4.12466	7.84964	15.8628	7.65157	12.1836	-1.65651	-6.81928	21.6858		450	1.55222	1.59982	5.20961	3.02946	6.89223	6.89223	21.0574	5.53177	4.08557
500	4.86278	1.97475	4.21871	-5.37896	0.708943	4.51533	6.90059	3.96834	2.24733	12.6637	2.80923	1.94897	-3.41491	7.09988	1.34738	-2.47981	-4.81292	21.0271		500	-1.61102	3.92994	3.60174	-0.181427	6.23088	5.98767	9.88716	12.525	1.95441	-3.06105	4.66416	11.1137	12.9894	8.73614	8.10133	-1.14796	-7.22782	17.8938		500	1.96175	1.70171	3.78506	4.13971	7.6568	7.6568	21.9371	5.91263	4.70688
550	6.04912	1.81745	1.71742	-4.27965	-0.520657	5.39893	5.84523	3.91411	2.40053	14.1733	2.72083	1.59103	-4.04256	7.08012	-1.12877	-1.89956	-3.08641	20.1232		550	0.298106	3.88397	3.86264	0.148867	5.20515	9.65471	11.801	11.9149	2.3874	-1.32455	5.05041	11.5643	15.7163	9.84871	5.97872	-1.06756	-5.44294	18.4379		550	2.20502	1.73267	2.69266	2.68971	7.20097	7.20097	22.9547	4.46257	4.73837
600	6.84094	2.22885	2.19434	-4.31565	-1.02397	10.5962	6.196	6.40789	2.33162	13.9106	2.8187	2.8979	-1.19031	7.48482	-0.025325	-1.82976	-10.4485	17.7792		600	0.0312353	4.05886	3.15609	-0.123027	4.83389	6.85212	13.4557	11.0637	2.95024	-0.626708	5.11716	9.63817	14.5489	6.40129	3.01392	-1.16156	-9.85854	13.1357		600	2.6012	1.87695	1.19936	2.08696	6.83069	6.83069	22.8286	3.00674	5.50375
650	6.01946	2.1696	5.79508	-3.10696	-0.345171	11.3909	6.6176	8.53966	2.41612	12.1201	2.59897	1.1597	4.10744	7.44624	-0.759175	-1.94031	-13.7735	13.2867		650	-1.62218	4.19978	3.89249	-0.40884	4.45697	6.22763	15.6335	13.9758	2.8281	-5.08689	5.21753	7.30196	16.1577	3.53843	-0.000373333	-0.916063	-11.4418	10.4013		650	2.17603	1.92778	2.99276	4.71831	7.19846	7.19846	23.2053	2.96537	5.62192
700	4.81983	1.95505	5.13188	0.358587	-0.288886	11.0058	5.43509	6.29046	2.97239	8.69737	2.8763	3.29823	5.65219	6.42929	-0.922325	-1.32621	-5.59604	8.48026		700	-2.10881	4.04249	5.71559	0.412973	5.19931	5.95327	16.0535	16.3602	2.66181	-6.53889	5.31191	7.94303	15.676	6.88586	2.10027	-0.921412	-8.55712	8.58249		700	2.14606	2.31239	5.57086	6.12166	7.724	7.724	23.8873	3.89954	5.13965
750	6.68562	1.7397	3.54708	1.21501	-0.411114	10.8965	5.00309	4.89874	1.70518	10.0687	2.78537	2.1397	1.75039	7.21659	-0.387775	-1.80091	-15.3758	8.37624		750	-1.57964	3.93714	6.83879	0.814307	5.4398	4.64411	15.6487	16.8552	3.24654	-8.58228	5.08691	3.33497	26.633	8.52643	2.37264	-0.957762	-8.06669	9.8106		750	2.15	2.08302	6.97471	3.85191	8.05326	8.05326	23.9663	5.36217	5.52177
800	7.40168	1.56075	4.896	1.13011	-0.226029	14.8945	5.86389	2.93446	1.59138	8.65246	2.45817	5.23397	-0.162312	6.65282	-1.14367	-2.11011	-15.5043	8.46322		800	-1.47046	3.80902	8.13479	1.01841	5.1542	6.65187	13.5455	16.9868	3.02096	-9.18105	4.84691	4.31401	21.9659	3.883	2.53045	-1.06176	-8.63116	6.04909		800	2.52114	2.08735	7.05891	3.01086	8.73617	8.73617	24.2576	4.51411	4.11277
850	5.26069	1.19105	5.69951	0.82088	0.214429	15.6466	5.33701	1.44166	2.12576	8.00829	2.5351	3.2751	-0.714112	6.53612	-2.15957	-1.51021	-11.249	9.79126		850	-2.2562	3.50662	8.47354	1.06284	5.19118	10.0704	12.6126	18.2213	3.16897	-7.37742	4.49528	12.1328	15.779	-0.726714	1.1336	-1.08686	-8.16207	5.15064		850	2.08655	1.60138	6.79896	2.29561	9.11029	9.11029	23.7163	1.73971	4.26901
MICRO-INTERVALS																				MICRO-INTERVALS																				MICRO-INTERVALS
100	0.426723	0.06725	1.59058	0.245093	0.0574571	2.28378	-1.36741	-2.76537	0.752762	7.05326	0.0219767	3.00703	0.0290375	0.108106	4.44418	-0.814613	-0.281909	3.14658		100	-1.44124	1.2892	2.51989	-0.24068	0.583738	-0.531937	-1.44347	-3.63709	-0.20151	-0.159385	0.104466	-1.85649	1.49775	-0.336729	7.53611	-1.03026	1.90781	4.8286		100	2.68969	0.0158706	1.32241	-2.04059	0.865429	0.865429	8.09278	-0.0889714	0.0818393
110	1.04703	0.1255	1.8752	-0.13064	0.636029	2.29453	-2.41328	-2.2468	0.741608	8.26897	0.0389767	3.0207	-0.0972125	0.226459	5.06368	-0.918613	0.924561	3.7429		110	-1.58641	1.17628	1.99289	-0.30628	0.363738	-0.939386	-1.81335	-4.14909	-0.08891	0.0387692	0.0862156	-2.12636	0.614062	-0.380729	8.52864	-0.901013	2.03412	5.88617		110	3.73031	0.0697529	1.67366	-2.07109	0.984	0.984	8.53753	0.392171	-0.0847321
120	1.15195	0.22775	2.41305	-1.38611	0.826314	3.16522	-2.37008	-1.12194	0.564531	9.21983	0.0498433	2.8827	0.0337875	0.278224	4.66443	-0.979863	2.43156	3.85947		120	-2.01018	1.04274	1.84989	-0.211613	0.591431	-1.97132	-1.26229	-3.72459	0.0440233	0.0261538	0.0722156	-2.59036	-0.126862	-0.410443	7.58224	-1.07801	1.87515	5.35738		120	4.12385	0.128812	1.88066	-2.30559	1.30086	1.30086	9.00228	0.623886	0.160482
130	1.26149	0.18725	2.5232	-2.52824	1.57174	4.35839	-2.25088	-0.0579429	0.291146	9.90126	0.0720433	2.69503	0.503288	0.285753	5.04343	-1.38461	3.89936	4.41096		130	-2.20853	0.979046	1.76839	0.07052	0.436354	-2.60809	-0.859471	-3.67109	0.164957	-0.431077	0.0666531	-2.52769	-0.284092	-0.411871	8.53024	-0.881263	2.08203	4.10927		130	3.71892	0.198459	2.76966	-2.52084	1.41743	1.41743	9.97527	1.8016	0.325339
140	1.53749	0.17475	2.58412	-3.62237	1.46031	5.27388	-2.52875	0.477771	0.172762	9.76783	0.0785767	2.2827	1.43054	0.317988	5.71593	-1.25961	4.54179	5.12385		140	-2.40453	0.906738	1.16539	0.310787	0.799123	-3.01144	-0.450294	-4.17459	0.05969	-0.125846	0.0685281	-2.39116	0.250062	-0.389871	8.17557	-1.22301	1.26538	5.00963		140	3.87092	0.259165	2.70041	-2.93384	1.05086	1.05086	10.0333	1.18074	0.481554
150	1.75842	0.24475	2.50043	-4.15304	1.46317	5.23804	-2.32661	0.928343	0.138531	9.52211	0.0915767	2.38937	1.86954	0.348576	6.26193	-1.46511	3.94945	4.8369		150	-2.36947	0.878431	0.926138	0.283853	1.01697	-1.73791	-0.248412	-3.40834	0.0793567	-0.469538	0.0555906	-2.38103	1.1316	-0.418157	7.80624	-1.35076	0.524945	4.96199		150	3.98323	0.346224	2.78991	-2.68109	1.41	1.41	10.3195	1.87817	0.309482
160	2.33749	0.24175	2.28289	-4.82931	1.59174	5.22013	-2.19808	2.43491	0.0717615	9.79411	0.0693767	2.81003	2.81379	0.341282	5.39218	-1.39111	2.43809	6.4465		160	-2.12876	0.8292	1.33139	0.215853	1.33512	-0.593361	0.227118	-2.11934	0.178823	-0.503385	0.0635281	-2.42876	3.08083	-0.382729	8.38251	-1.29576	-0.0739344	4.59994		160	3.44723	0.420576	3.47466	-2.46509	1.56029	1.56029	10.3193	1.96817	0.0705536
170	3.43565	0.2225	2.44474	-4.82584	1.25574	5.24163	-1.97541	3.10463	-0.399315	10.323	0.06471	2.9647	3.30279	0.308576	5.21818	-1.18836	-0.504039	7.4598		170	-2.02053	0.786123	0.733388	0.162787	0.829277	-0.384518	0.722176	-0.366588	0.265157	-0.224923	0.0379031	-2.14529	4.87591	-0.396157	7.37824	-1.46351	-0.426729	5.14301		170	3.20938	0.419165	2.66941	-1.94709	1.55229	1.55229	10.3655	2.42503	-0.171232
180	3.49903	0.20175	3.23397	-4.25117	1.14174	4.15237	-2.10688	2.95949	-0.756392	10.9033	0.0988433	2.9577	3.36754	0.332341	5.20093	-1.04511	-2.86689	8.18165		180	-2.10147	0.870123	0.830638	0.358787	1.46374	-0.226861	0.816529	0.199412	0.14649	-0.0187692	0.00952813	-2.05409	6.80822	-0.4373	8.58891	-1.29801	-1.37405	6.20534		180	3.08446	0.377988	2.68991	-1.94709	1.55171	1.55171	10.151	1.76417	-0.386304
190	3.68242	0.18	3.08074	-3.84931	1.54774	3.48053	-2.18608	3.40491	-0.930546	11.1624	0.13211	3.0337	3.26429	0.327635	5.29568	-0.804863	-4.41744	8.59414		190	-2.07394	0.875969	0.923888	-0.08788	1.29666	0.522518	1.10594	1.27866	-0.06731	-1.09354	-0.0137844	-1.61463	8.30237	-0.517871	8.63691	-1.42476	-1.02343	7.14381		190	2.92569	0.363635	3.33191	-1.89634	2.22486	2.22486	10.0573	2.0616	-0.336161
200	3.62795	0.146	3.90135	-2.50877	1.9766	2.61701	-2.20048	3.0932	-1.08624	11.6041	0.148843	2.71337	3.27929	0.344106	4.72568	-0.846363	-5.22974	9.19494		200	-2.05041	0.822738	0.352138	0.0643867	1.73451	1.44389	1.08618	1.39466	-0.145043	-0.850154	0.0108406	-1.74716	7.84514	-0.523871	10.9833	-1.75676	-0.853566	7.93937		200	3.17738	0.442224	3.32816	-1.59759	1.71486	1.71486	10.526	1.33817	-0.0948036
210	3.46488	0.1875	3.97951	-1.70931	1.93546	2.14045	-1.43141	3.18577	-1.03647	11.4418	0.167843	2.73003	3.34279	0.365282	5.52293	-1.01186	-4.23451	9.77781		210	-1.76994	0.611969	0.288638	0.08412	1.70958	1.7203	1.42218	1.73041	-0.102577	-1.00185	0.0625906	-2.17116	6.42822	-0.530443	12.1777	-1.24226	-1.76386	8.92072		210	2.92077	0.553282	3.69491	-1.28709	2.05114	2.05114	10.5268	1.28674	0.243482
220	2.79257	0.331	3.82474	-1.06104	2.38603	1.66032	-0.976213	4.09463	-0.858238	11.1995	0.179043	3.2857	3.45929	0.432106	5.61193	-1.40311	-2.28761	11.5264		220	-0.857706	0.498431	0.556888	0.08252	2.02374	2.63143	1.96076	2.10266	0.0439567	-1.50215	0.114403	-2.51783	5.48975	-0.536443	11.6708	-1.48701	-1.87928	9.72104		220	2.85185	0.621988	3.76516	-1.09034	2.44543	2.44543	10.3415	2.69046	0.483768
230	3.71011	0.53525	3.88258	-1.03464	2.14774	1.51879	-0.533547	4.67063	-0.745238	11.2713	0.167377	3.82137	3.58754	0.474694	5.39543	-0.933613	0.589188	12.5038		230	-0.276294	0.460585	-0.0346125	0.245987	2.26774	2.46763	2.25935	2.00866	0.15509	-2.30985	0.131778	-1.84289	3.68114	-0.5593	12.1214	-1.58501	-2.69594	8.76828		230	3.15738	0.637753	4.67891	-0.329087	2.63686	2.63686	10.076	2.54931	0.656982
240	5.05749	0.75525	4.03058	-1.20717	2.45889	1.6442	-0.18848	5.42663	-0.969546	11.9253	0.182243	4.6647	3.42329	0.450459	4.11693	-0.841113	2.84751	13.0194		240	-0.473941	0.483354	-0.108362	0.377453	2.73112	1.67935	2.161	2.68216	0.311757	-1.75877	0.128653	-0.85756	1.30975	-0.518157	10.9233	-1.58151	-2.98775	9.70198		240	3.36077	0.683871	5.07666	-0.460837	2.54743	2.54743	10.0348	3.69531	1.26698
250	5.84088	0.97475	3.72997	-1.62237	3.07689	2.15837	0.152853	5.77949	-1.12662	12.0304	0.23551	5.3957	3.07779	0.502224	4.06368	-0.713363	4.93379	13.154		250	-0.373471	0.511046	0.190888	0.0427867	3.07143	1.25757	2.10688	3.58816	0.46949	-0.747077	0.110716	0.547507	0.592831	-0.5773	11.994	-1.40751	-3.39064	12.3602		250	3.65492	0.745753	5.03391	-0.494587	2.47229	2.47229	10.8273	3.42789	1.77527
260	6.67165	1.16	4.5792	-2.09837	3.40003	3.15268	1.10325	5.31663	-1.17208	11.8893	0.271977	5.81203	3.09754	0.483871	4.13193	-0.806863	5.64155	13.5664		260	-0.262412	0.627662	0.584638	-0.0156133	3.20066	0.64332	2.08829	4.84566	0.631823	0.164615	0.0919656	2.33737	0.822985	-0.508443	11.226	-1.20401	-4.08098	14.0895		260	3.34938	0.878929	4.46216	-0.806338	2.53086	2.53086	11.6625	3.46446	1.87477
270	7.28826	1.2365	4.76997	-2.71224	3.76746	4.44439	2.07285	5.10863	-1.1277	12.4615	0.276843	5.76803	3.22454	0.455871	4.86118	-0.549113	5.05356	13.7189		270	-0.261235	0.792892	0.671388	-0.284413	3.40158	-0.38247	1.69935	6.19266	0.815023	0.807077	0.121903	4.38511	1.88268	-0.357014	12.5169	-1.30526	-4.40547	14.8231		270	3.33738	0.967635	4.50341	-0.947838	2.63143	2.63143	12.075	2.92189	1.62241
280	7.2538	1.0965	4.47766	-3.35331	4.29003	5.71997	2.38565	5.10977	-0.933392	13.415	0.293443	5.78103	3.55379	0.4314	5.16743	-0.743863	3.49865	14.0238		280	-0.299353	0.935969	1.37664	0.0238533	3.72928	-2.16993	1.70571	6.95041	0.971757	1.42585	0.147966	7.25471	3.8836	-0.141014	12.3718	-1.25751	-4.39022	17.5813		280	3.55677	1.06269	4.54341	-1.10884	3.09429	3.09429	12.5818	3.03131	1.55484
290	7.61903	0.99925	4.83458	-3.26184	4.6026	6.29685	3.02032	4.84891	-0.832238	14.7338	0.28671	6.7957	4.01704	0.453988	6.33343	-1.17836	2.20507	14.6649		290	-0.508529	1.03074	1.46964	-0.17428	3.60097	-4.22151	1.90735	7.55391	1.01916	1.64677	0.157466	8.79124	5.93806	0.0187	11.8156	-1.05751	-3.86539	20.4634		290	3.85677	1.16599	4.72841	-1.17234	3.282	3.282	13.069	2.41046	1.62948
300	8.69811	0.973	4.85212	-3.54931	4.6146	7.21771	3.05419	4.20806	-1.13801	14.7301	0.270843	7.77537	4.03629	0.469753	6.47518	-1.08361	1.41891	16.3866		300	-0.202412	1.30212	1.45239	-0.301213	3.91051	-4.19284	2.47512	7.99466	1.16096	1.79477	0.167903	9.52004	7.3716	0.201843	12.5798	-1.38676	-2.95073	21.6639		300	4.22631	1.31987	4.21016	-1.19759	3.90543	3.90543	13.4775	2.68131	1.58341
310	9.02888	1.04325	4.51674	-3.87837	4.41431	8.41984	3.26965	3.47806	-1.28008	15.6933	0.270177	8.47537	4.18354	0.465282	7.53743	-1.24311	0.430213	17.2564		310	-0.182176	1.62305	1.73489	-0.0340133	3.94866	-3.2121	2.92524	8.22616	1.28669	1.52369	0.193841	9.85364	8.31652	0.281557	12.1006	-1.29501	-0.912366	23.1645		310	4.90323	1.32811	4.49016	-1.08259	3.97143	3.97143	13.8823	3.01103	1.6637
320	9.12426	1.1805	5.29458	-3.53971	4.71146	8.33205	3.04245	3.30463	-1.10216	15.8544	0.283177	8.4637	4.37279	0.526459	8.12668	-1.25311	0.499901	17.2968		320	-0.00805882	1.75197	1.29764	-0.0652133	4.29605	-1.52087	3.66759	8.33041	1.28696	1.6	0.251216	10.052	8.45529	0.280986	13.687	-1.41151	0.48139	23.5218		320	5.406	1.28364	5.60316	-0.601837	4.01657	4.01657	15.0548	3.77703	1.94162
330	10.4375	1.41325	4.53551	-4.01091	4.43689	7.79996	3.30725	3.74034	-0.528085	16.3953	0.30631	8.4847	4.94554	0.636106	8.25243	-1.47811	0.545634	18.3908		330	0.546059	1.80582	0.953638	0.217453	4.00312	0.00245698	3.88594	8.18691	1.24802	1.55969	0.311466	9.36644	8.42237	0.3887	13.214	-1.85926	1.55066	23.317		330	5.99492	1.28105	5.08016	-0.297587	4.41086	4.41086	15.555	4.96331	2.55434
340	10.5563	1.60025	5.64197	-3.45544	4.19546	7.54735	3.50832	3.86549	-0.255008	16.305	0.298843	7.3727	5.70779	0.700576	7.78893	-1.56011	1.06176	18.9512		340	1.12582	1.89228	1.45414	0.385987	4.40989	1.3497	3.96594	7.79466	1.32462	1.49046	0.342966	8.33284	8.56822	0.467557	13.6857	-1.80901	2.55025	24.3745		340	4.81492	1.18599	5.05091	0.134662	4.78857	4.78857	16.1628	5.26646	2.92634
350	10.6073	1.68075	6.5832	-3.20131	4.0746	8.13498	3.66432	4.2412	-0.223854	16.0075	0.30351	5.69837	6.56329	0.710224	8.15443	-1.38036	2.17676	18.875		350	0.651235	1.98951	2.02589	0.55772	5.15205	1.62816	3.68735	7.85216	1.48222	1.28462	0.341653	8.01284	11.2861	0.407271	13.9868	-1.46376	3.13824	25.2606		350	4.42723	1.0994	5.43091	-0.179088	4.78343	4.78343	16.5783	5.75903	3.04077
360	10.3046	1.71325	7.13858	-3.15277	4.00603	8.8946	3.83019	4.26463	-0.199315	15.8504	0.30111	4.17503	7.09204	0.736576	8.43193	-1.68411	2.89542	19.2785		360	0.438765	2.02612	2.46464	0.156653	4.85605	1.43979	3.79912	8.83741	1.49282	2.30738	0.339966	8.62431	13.5562	0.395271	13.4793	-1.74151	3.48232	25.7322		360	3.70169	1.08905	5.18141	0.163413	4.714	4.714	16.6213	5.85903	2.82248
370	9.89442	1.73225	7.19089	-3.00877	3.9826	9.28157	4.08832	5.08406	-0.223162	14.4915	0.301577	2.58703	7.67754	0.821047	8.07543	-1.74736	3.74909	18.9378		370	0.0171176	2.04182	3.00589	-0.21588	5.72528	1.39475	3.71394	9.50316	1.39096	2.44369	0.341716	10.0726	14.8233	0.349271	14.2817	-1.64026	2.58509	24.9605		370	3.69123	1.07658	4.90866	0.461413	4.98229	4.98229	16.3678	6.02817	2.70562
380	9.18211	1.669	7.58074	-2.95944	4.1526	9.44281	4.14912	4.75949	-0.315238	12.7795	0.315777	1.5157	7.76679	0.785988	7.37943	-1.55511	4.05616	18.3998		380	0.115471	2.21474	3.65339	0.178253	5.62035	0.934063	3.449	10.6162	1.16969	3.55077	0.336528	10.6851	16.3233	0.412986	13.5054	-1.56176	2.92264	23.8839		380	3.74938	1.06199	4.72941	0.534662	5.39143	5.39143	16.5733	5.91589	2.75655
390	8.91534	1.57425	7.38535	-2.59971	3.66574	9.96415	3.88459	5.11491	-0.317469	10.4195	0.348577	0.971033	7.75104	0.824341	7.27893	-1.53536	3.5335	16.8081		390	-0.103824	2.41105	3.27789	0.103053	5.89143	0.67608	3.69629	11.0564	1.00522	4.35046	0.292653	11.1315	17.0313	0.506414	13.8956	-1.32851	1.8207	20.0823		390	2.87031	1.06269	4.63766	0.929413	5.05886	5.05886	16.9515	5.34989	2.84577
400	8.62211	1.5555	8.64966	-2.15251	3.5906	9.85666	3.90565	4.98663	-0.515315	8.4684	0.382177	0.720367	7.39729	0.844812	7.11643	-1.46661	2.63191	15.0864		400	0.0862941	2.62951	3.72864	0.37372	6.81543	0.950443	3.60006	10.9217	1.01789	4.68985	0.247841	10.6214	16.4574	0.574414	13.779	-1.40226	1.0084	17.8624		400	2.54138	1.14199	4.23091	1.20241	5.25057	5.25057	17.6105	5.09731	2.83884
[truncated: 66 more columns]

## Sheet: SAMPLE
Contributions of the left- and the right-hemisphere on the language-induced grip force modulation of the left hand in unimanual task
Spreadsheet S1: Dataset
Sample dataset by linguistic processing phases, intervals, and micro-intervals, in millinewtons.
	P01	P02	P03	P04	P05	P06	P07	P08	P09	P10	P11	P12	P13	P14	P15	P16	x	P17	x	P18
sex	F	F	F	F	F	F	F	M	M	M	M	M	M	M	M	M	M	M	M	M
age	42.2341	34.7242	45.232	23.7454	26.4285	26.0862	25.4949	35.0281	35.9562	56.2026	28.3395	30.2313	45.2539	33.963	25.9822	26.1602	21.7029	26.0397	28.6927	22.6283
schooling	15	11	18	8	12	14	8	11	13	8	15	13	5	13	11	11	13	12.6	15	11
EHI	95	85	100	90	95	95	100	80	80	90	95	85	95	85	80	100	95	80	95	90
