# Supplementary material for: Contributions of the Left- and the Right-Hemisphere on the Language-Induced Grip Force Modulation of the Left Hand in Unimanual Task
Source: Preprints.org preprint supplement (doi:10.20944/preprints201907.0139.v1), 2019-07-10
Supplement: Supplementary file 1 [file supplementary]

PLAYLISTS

Playlists’ word sequence, by block. Total number of repetitions by block in brackets.

| AMARRAR – TO TIE |         |         | DIRIGIR – TO DRIVE |         |         |
|------------------|---------|---------|--------------------|---------|---------|
| BLOCK 1          |         | BLOCK 2 | BLOCK 1            |         | BLOCK 2 |
| [11]             |         | [7]     | [8]                |         | [10]    |
| 1                | Tábua   | Pato    | 1                  | Repolho | Sapo    |
| 2                | Sapo    | Mala    | 2                  | Estrela | Dominó  |
| 3                | Mamãe   | Amarrar | 3                  | Mala    | Mala    |
| 4                | Água    | Rato    | 4                  | Dirigir | Dirigir |
| 5                | Carro   | Faca    | 5                  | Jogo    | Bolsa   |
| 6                | Amarrar | Escola  | 6                  | Dominó  | Jogo    |
| 7                | Tatu    | Carro   | 7                  | Faca    | Dirigir |
| 8                | Amarrar | Bola    | 8                  | Bola    | Repolho |
| 9                | Aranha  | Amarrar | 9                  | Dirigir | Dirigir |
| 10               | Repolho | Abraço  | 10                 | Pato    | Carro   |
| 11               | Amarrar | Estrela | 11                 | Tatu    | Pato    |
| 12               | Sapato  | Apito   | 12                 | Abraço  | Papai   |
| 13               | Estrela | Tatu    | 13                 | Bolsa   | Dirigir |
| 14               | Lanche  | Amarrar | 14                 | Dirigir | Tábua   |
| 15               | Amarrar | Avião   | 15                 | Carro   | Rato    |
| 16               | Urso    | Antena  | 16                 | Jiló    | Leite   |
| 17               | Rato    | Amarrar | 17                 | Prego   | Dirigir |
| 18               | Amarrar | Aranha  | 18                 | Dirigir | Sapato  |
| 19               | Escola  | Jiló    | 19                 | Avião   | Estrela |
| 20               | Jogo    | Mamãe   | 20                 | Papai   | Caderno |
| 21               | Pato    | Água    | 21                 | Dirigir | Prego   |
| 22               | Prego   | Amarrar | 22                 | Rato    | Dirigir |
| 23               | Amarrar | Lanche  | 23                 | Leite   | Abraço  |
| 24               | Caderno | Jogo    | 24                 | Sapato  | Bola    |
| 25               | Bolsa   | Tábua   | 25                 | Sapo    | Antena  |
| 26               | Amarrar | Bolsa   | 26                 | Urso    | Avião   |
| 27               | Jiló    | Amarrar | 27                 | Tábua   | Dirigir |
| 28               | Abraço  | Repolho | 28                 | Dirigir | Aranha  |
| 29               | Mala    | Sapo    | 29                 | Caderno | Apito   |
| 30               | Apito   | Papai   | 30                 | Mamãe   | Dirigir |
| 31               | Amarrar | Prego   | 31                 | Aranha  | Lanche  |
| 32               | Antena  | Caderno | 32                 | Lanche  | Mamãe   |
| 33               | Dominó  | Dominó  | 33                 | Dirigir | Escola  |
| 34               | Amarrar | Sapato  | 34                 | Antena  | Jiló    |
| 35               | Bola    | Amarrar | 35                 | Apito   | Dirigir |
| 36               | Amarrar | Urso    | 36                 | Dirigir | Urso    |
| 37               | Avião   | Leite   | 37                 | Escola  | Água    |
| 38               | Papai   |         | 38                 | Água    | Dirigir |
| 39               | Amarrar |         | 39                 |         | Tatu    |
| 40               | Faca    |         | 40                 |         | Faca    |
| 41               | Leite   |         | 41                 |         |         |

PLAYLISTS

Playlists’ word sequence, by block. Total number of repetitions by block in brackets.

| ESCREVER – TO WRITE |                 |                 | DESENHAR – TO DRAW |                 |                 |
|---------------------|-----------------|-----------------|--------------------|-----------------|-----------------|
| BLOCK 1             |                 | BLOCK 2         | BLOCK 1            |                 | BLOCK 2         |
| [9]                 |                 | [9]             | [7]                |                 | [11]            |
| 1                   | Estrela         | Bolsa           | 1                  | Aranha          | Prego           |
| 2                   | <i>Escrever</i> | <i>Escrever</i> | 2                  | <i>Desenhar</i> | Mala            |
| 3                   | Papai           | Rato            | 3                  | Bola            | <i>Desenhar</i> |
| 4                   | Apito           | Bola            | 4                  | <i>Desenhar</i> | Carro           |
| 5                   | Lanche          | <i>Escrever</i> | 5                  | Leite           | Tábua           |
| 6                   | Avião           | Aranha          | 6                  | Tábua           | <i>Desenhar</i> |
| 7                   | Antena          | Carro           | 7                  | Bolsa           | Apito           |
| 8                   | Jiló            | Apito           | 8                  | Pato            | Sapo            |
| 9                   | Repolho         | Mamãe           | 9                  | Faca            | <i>Desenhar</i> |
| 10                  | Dominó          | Faca            | 10                 | <i>Desenhar</i> | Sapato          |
| 11                  | <i>Escrever</i> | Dominó          | 11                 | Avião           | Caderno         |
| 12                  | Leite           | <i>Escrever</i> | 12                 | Mamãe           | <i>Desenhar</i> |
| 13                  | Bolsa           | Mala            | 13                 | Antena          | Rato            |
| 14                  | Mamãe           | Tábua           | 14                 | Lanche          | Avião           |
| 15                  | Água            | Sapato          | 15                 | Sapo            | Tatu            |
| 16                  | <i>Escrever</i> | <i>Escrever</i> | 16                 | Estrela         | Aranha          |
| 17                  | Tatu            | Estrela         | 17                 | Dominó          | Antena          |
| 18                  | <i>Escrever</i> | Escola          | 18                 | <i>Desenhar</i> | <i>Desenhar</i> |
| 19                  | Sapato          | Pato            | 19                 | Repolho         | Água            |
| 20                  | <i>Escrever</i> | <i>Escrever</i> | 20                 | Apito           | Estrela         |
| 21                  | Escola          | Sapo            | 21                 | <i>Desenhar</i> | Escola          |
| 22                  | <i>Escrever</i> | Repolho         | 22                 | Escola          | <i>Desenhar</i> |
| 23                  | Carro           | Tatu            | 23                 | Tatu            | Repolho         |
| 24                  | Mala            | <i>Escrever</i> | 24                 | Água            | <i>Desenhar</i> |
| 25                  | Bola            | Jiló            | 25                 | Sapato          | Dominó          |
| 26                  | Aranha          | Papai           | 26                 | Papai           | Mamãe           |
| 27                  | <i>Escrever</i> | Caderno         | 27                 | <i>Desenhar</i> | <i>Desenhar</i> |
| 28                  | Caderno         | <i>Escrever</i> | 28                 | Carro           | Pato            |
| 29                  | Faca            | Leite           | 29                 | Caderno         | Bolsa           |
| 30                  | Tábua           | Antena          | 30                 | Jiló            | Jiló            |
| 31                  | <i>Escrever</i> | Prego           | 31                 | Mala            | Papai           |
| 32                  | Sapo            | <i>Escrever</i> | 32                 | Rato            | <i>Desenhar</i> |
| 33                  | <i>Escrever</i> | Avião           | 33                 | <i>Desenhar</i> | Faca            |
| 34                  | Rato            | <i>Escrever</i> | 34                 | Prego           | <i>Desenhar</i> |
| 35                  | Prego           | Água            | 35                 |                 | Leite           |
| 36                  | Pato            | Lanche          | 36                 |                 | Bola            |
| 37                  |                 |                 | 37                 |                 | <i>Desenhar</i> |
| 38                  |                 |                 | 38                 |                 | Lanche          |
| 39                  |                 |                 | 39                 |                 |                 |
| 40                  |                 |                 | 40                 |                 |                 |
| 41                  |                 |                 | 41                 |                 |                 |

PLAYLISTS

Playlists’ word sequence, by block. Total number of repetitions by block in brackets.

| SEGURAR – TO HOLD |                |                | PUXAR – TO PULL |              |              |
|-------------------|----------------|----------------|-----------------|--------------|--------------|
| BLOCK 1           |                | BLOCK 2        | BLOCK 1         |              | BLOCK 2      |
| [9]               |                | [9]            | [10]            |              | [8]          |
| 1                 | Mala           | Dominó         | 1               | Repolho      | Caderno      |
| 2                 | Avião          | Pato           | 2               | Avião        | Jogo         |
| 3                 | <i>Segurar</i> | Sapo           | 3               | Apito        | Urso         |
| 4                 | Sapo           | <i>Segurar</i> | 4               | Leite        | Prego        |
| 5                 | Jiló           | Repolho        | 5               | <i>Puxar</i> | <i>Puxar</i> |
| 6                 | Sapato         | Escola         | 6               | Tábua        | Repolho      |
| 7                 | <i>Segurar</i> | <i>Segurar</i> | 7               | Carro        | Mala         |
| 8                 | Jogo           | Bola           | 8               | <i>Puxar</i> | Faca         |
| 9                 | Faca           | Lanche         | 9               | Sapo         | <i>Puxar</i> |
| 10                | Dominó         | <i>Segurar</i> | 10              | <i>Puxar</i> | Leite        |
| 11                | Papai          | Jogo           | 11              | Papai        | Sapo         |
| 12                | Apito          | <i>Segurar</i> | 12              | Abraço       | <i>Puxar</i> |
| 13                | <i>Segurar</i> | Leite          | 13              | Sapato       | Carro        |
| 14                | Escola         | Bolsa          | 14              | Tatu         | Apito        |
| 15                | Urso           | Faca           | 15              | <i>Puxar</i> | Escola       |
| 16                | Estrela        | Avião          | 16              | Antena       | Água         |
| 17                | <i>Segurar</i> | Tábua          | 17              | Estrela      | <i>Puxar</i> |
| 18                | Bolsa          | <i>Segurar</i> | 18              | Bolsa        | Tatu         |
| 19                | Tábua          | Mamãe          | 19              | <i>Puxar</i> | Dominó       |
| 20                | <i>Segurar</i> | Urso           | 20              | Rato         | Avião        |
| 21                | Carro          | Carro          | 21              | <i>Puxar</i> | Tábua        |
| 22                | Bola           | Rato           | 22              | Jogo         | <i>Puxar</i> |
| 23                | Aranha         | Aranha         | 23              | Aranha       | Bolsa        |
| 24                | Abraço         | <i>Segurar</i> | 24              | Caderno      | Sapato       |
| 25                | <i>Segurar</i> | Mala           | 25              | Lanche       | <i>Puxar</i> |
| 26                | Leite          | Apito          | 26              | <i>Puxar</i> | Lanche       |
| 27                | Mamãe          | <i>Segurar</i> | 27              | Água         | Abraço       |
| 28                | Lanche         | Papai          | 28              | Urso         | Rato         |
| 29                | <i>Segurar</i> | <i>Segurar</i> | 29              | Jiló         | <i>Puxar</i> |
| 30                | Repolho        | Tatu           | 30              | <i>Puxar</i> | Bola         |
| 31                | Rato           | Prego          | 31              | Dominó       | Antena       |
| 32                | Tatu           | Sapato         | 32              | Bola         | Estrela      |
| 33                | <i>Segurar</i> | Jiló           | 33              | Escola       | Jiló         |
| 34                | Prego          | Abraço         | 34              | Faca         | Papai        |
| 35                | Antena         | <i>Segurar</i> | 35              | Mala         | <i>Puxar</i> |
| 36                | <i>Segurar</i> | Caderno        | 36              | <i>Puxar</i> | Aranha       |
| 37                | Pato           | Estrela        | 37              | Mamãe        | Pato         |
| 38                | Água           | Antena         | 38              | Pato         | Mamãe        |
| 39                | Caderno        | Água           | 39              | <i>Puxar</i> |              |
| 40                |                |                | 40              | Prego        |              |
| 41                |                |                | 41              |              |              |
