# Supplementary material for: Contributions of the Left- and the Right-Hemisphere on the Language-Induced Grip Force Modulation of the Left Hand in Unimanual Task
Source: Preprints.org preprint supplement (doi:10.20944/preprints201907.0139.v1), 2019-07-10
Supplement: Supplementary file 2 [file supplementary]

## Word list

Portuguese nouns and verbs utilised in this research and its equivalents in English

| n | Portuguese verbs | English verbs | n | Portuguese verbs | English verbs |
|---|------------------|---------------|---|------------------|---------------|
| 1 | Desenhar         | To draw       | 4 | Puxar            | To pull       |
| 2 | Dirigir          | To drive      | 5 | Segurar          | To hold       |
| 3 | Escrever         | To write      | 6 | Amarrar          | To tie        |

| n  | Portuguese nouns | English nouns | n  | Portuguese nouns | English nouns |
|----|------------------|---------------|----|------------------|---------------|
| 1  | Antena           | Antenna       | 19 | Estrela          | Star          |
| 2  | Aranha           | Spider        | 20 | Giló             | Giloh         |
| 3  | Avião            | Avion         | 21 | Sapo             | Frog          |
| 4  | Mala             | Suitcase      | 22 | Brinquedo        | Toy           |
| 5  | Bola             | Ball          | 23 | Leite            | Milk          |
| 6  | Bolsa            | Bag           | 24 | Mamãe            | Mother        |
| 7  | Caderno          | Notebook      | 25 | Relógio          | Clock         |
| 8  | Pato             | Duck          | 26 | Urso             | Bear          |
| 9  | Sapato           | Shoe          | 27 | Papai            | Father        |
| 10 | Repolho          | Cabbage       | 28 | Pé               | Foot          |
| 11 | Prego            | Nail          | 29 | Tábua            | Board         |
| 12 | Lanche           | Snack         | 30 | Reunião          | Meeting       |
| 13 | Domingo          | Sunday        | 31 | Mochila          | Schoolbag     |
| 14 | Dominó           | Domino        | 32 | Apito            | Whistle       |
| 15 | Água             | Water         | 33 | Rato             | Mouse         |
| 16 | Escola           | School        | 34 | Tatu             | Armadillo     |
| 17 | Abraço           | Hug           | 35 | Carro            | Car           |
| 18 | Escada           | Ladder        |    |                  |               |
